# Supplementary material for: Improved hydrogen release from ammonia borane confined in microporous carbon with narrow pore size distribution
Source: Royal Society of Chemistry journal article supplement (doi:10.1039/c7ta02461d), 2017-01-01
Supplement: c7ta02461d1.pdf [file c7ta02461d1.pdf]

## ***Electronic Supplementary Information (ESI):***

### **Improved Hydrogen Release from Ammonia Borane Confined in Microporous Carbon with Narrow Pore Size Distribution**

Zhuxian Yang,<sup>a</sup> Dan Zhou,<sup>b</sup> Binling Chen,<sup>a</sup> Zongjian Liu,<sup>c</sup> Qinghua Xia,<sup>b</sup> Yanqiu Zhu,<sup>a</sup> and  
Yongde Xia<sup>a,\*</sup>

<sup>a</sup> *College of Engineering, Mathematics and Physical Sciences, University of Exeter, Exeter*

*EX4 4QF, United Kingdom. E-mail: y.xia@exeter.ac.uk*

<sup>b</sup> *Hubei Collaborative Innovation Centre for Advanced Organic Chemical Materials, &  
Ministry of Education Key Laboratory for the Synthesis and Application of Organic  
Functional Molecules, Hubei University, Wuhan 430062, China*

<sup>c</sup> *College of Chemical Engineering, Zhejiang University of Technology, Hangzhou 310014,  
China*

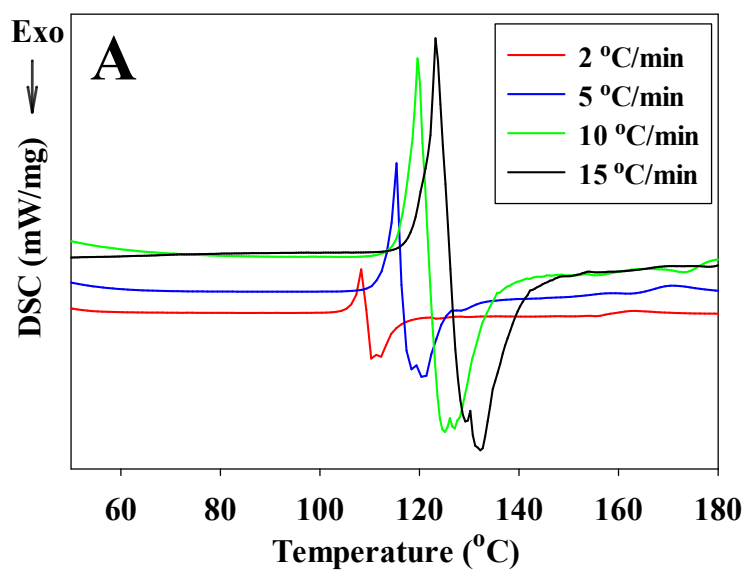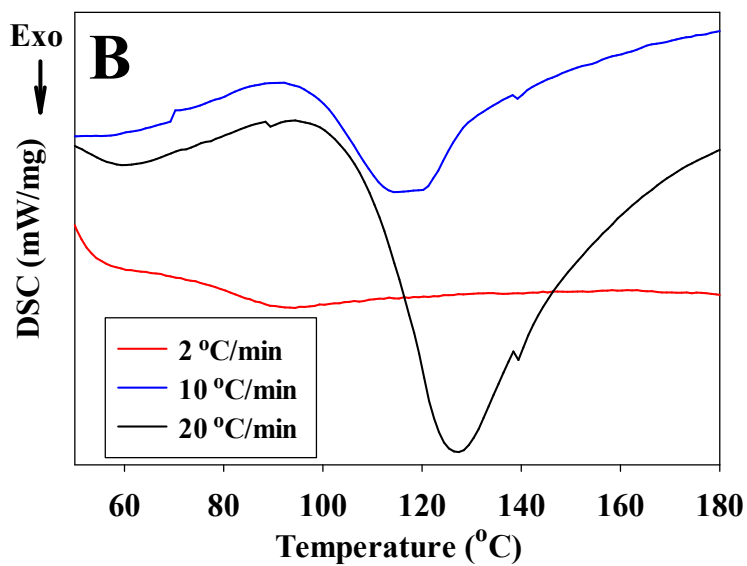

Fig. S1 DSC profiles for neat AB (A) and AB/CEMC (B) at various heating rate.
